# Supplementary material for: Giving Social Support at Work May Reduce Inflammation on Employees Themselves: A Participatory Workplace Intervention Study Among Japanese Hospital Nurses
Source: Research Square preprint supplement (doi:10.21203/rs.3.rs-384296/v1), 2021-04-08
Supplement: Supplementary file 1 [file 0e0fff51a03da94b5cfb1eba.pdf]

**Table S1. Changes of perceived job stress in Group 1 over time (n=13)**

|                                             | Number of items | T1     |                     |          | T2     |                     |          | T3     |                     |          | <i>p</i> -value | <i>p</i> -value (pairwise) <sup>b</sup>                    |
|---------------------------------------------|-----------------|--------|---------------------|----------|--------|---------------------|----------|--------|---------------------|----------|-----------------|------------------------------------------------------------|
|                                             |                 | Median | Interquartile range | $\alpha$ | Median | Interquartile range | $\alpha$ | Median | Interquartile range | $\alpha$ |                 |                                                            |
| Receiving social support                    | 3               | 23.0   | (20.3 - 28.5)       | 0.85     | 23.0   | (21.0 - 27.8)       | 0.81     | 24.0   | (19.0 - 27.0)       | 0.87     | 0.488           |                                                            |
| Psychosocial job stress                     |                 |        |                     |          |        |                     |          |        |                     |          |                 |                                                            |
| Quantitative workload <sup>a</sup>          | 3               | 10.0   | (8.0 - 10.5)        | 0.66     | 9.0    | (8.5 - 11.0)        | 0.23     | 9.0    | (8.0 - 10.5)        | 0.65     | 0.836           |                                                            |
| Qualitative workload <sup>a</sup>           | 3               | 10.0   | (9.0 - 12.0)        | 0.59     | 10.0   | (9.0 - 11.0)        | 0.70     | 9.0    | (9.0 - 11.0)        | 0.80     | 0.590           |                                                            |
| Job control                                 | 3               | 8.0    | (6.5 - 9.0)         | 0.77     | 8.0    | (5.0 - 9.0)         | 0.77     | 7.0    | (6.0 - 9.0)         | 0.78     | 0.902           |                                                            |
| Interpersonal conflict <sup>a</sup>         | 3               | 6.0    | (5.5 - 7.0)         | 0.27     | 6.0    | (5.0 - 7.5)         | 0.67     | 7.0    | (5.0 - 7.0)         | 0.68     | 0.905           |                                                            |
| Psychological and physical stress reactions |                 |        |                     |          |        |                     |          |        |                     |          |                 |                                                            |
| Vigor                                       | 3               | 6.0    | (3.5 - 6.5)         | 0.93     | 6.0    | (4.0 - 8.0)         | 0.80     | 5.0    | (3.5 - 6.0)         | 0.82     | 0.065           |                                                            |
| Irritation <sup>a</sup>                     | 3               | 6.0    | (5.0 - 8.0)         | 0.74     | 5.0    | (3.0 - 7.0)         | 0.79     | 5.0    | (4.0 - 5.5)         | -0.07    | 0.048           | T1 vs. T2: 0.350,<br>T1 vs. T3: 0.150,<br>T2 vs. T3: 1.000 |
| Fatigue <sup>a</sup>                        | 3               | 7.0    | (5.5 - 8.5)         | 0.84     | 6.0    | (4.5 - 8.0)         | 0.87     | 6.0    | (4.0 - 8.0)         | 0.86     | 0.020           | T1 vs. T2: 0.093,<br>T1 vs. T3: 0.150,<br>T2 vs. T3: 1.000 |
| Anxiety <sup>a</sup>                        | 3               | 5.0    | (4.0 - 6.5)         | 0.59     | 5.0    | (3.0 - 7.0)         | 0.81     | 4.0    | (3.5 - 5.5)         | 0.23     | 0.735           |                                                            |
| Physical stress response <sup>a</sup>       | 11              | 18.0   | (14.5 - 21.5)       | 0.79     | 17.0   | (14.5 - 22.5)       | 0.84     | 17.0   | (14.5 - 20.0)       | 0.81     | 0.643           |                                                            |
| Job satisfaction                            | 4               | 9.0    | (7.5 - 10.5)        | 0.76     | 9.0    | (7.5 - 10.5)        | 0.63     | 9.0    | (8.5 - 9.5)         | 0.79     | 0.674           |                                                            |
| CES-D <sup>a</sup>                          | 20              | 16.0   | (11.0 - 18.5)       | 0.74     | 12.0   | (7.5 - 18.0)        | 0.88     | 11.0   | (7.0 - 22.5)        | 0.91     | 0.302           |                                                            |

<sup>a</sup>Negatively oriented<sup>b</sup>Bonferroni test

T1: baseline (before the program); T2: immediately after the end of intervention; T3: 3 months after the intervention.

CES-D: Center for Epidemiologic Studies Depression Scale.
